## RESEARCH ARTICLE

# A mechanism linking perinatal 2,3,7,8 tetrachlorodibenzo-*p*-dioxin exposure to lower urinary tract dysfunction in adulthood

Anne E. Turco<sup>1</sup>, Steven R. Oakes<sup>2</sup>, Kimberly P. Keil Stietz<sup>2</sup>, Cheryl L. Dunham<sup>3</sup>, Diya B. Joseph<sup>4</sup>, Thrishna S. Chathurvedula<sup>2</sup>, Nicholas M. Girardi<sup>2</sup>, Andrew J. Schneider<sup>5</sup>, Joseph Gawdzik<sup>5</sup>, Celeste M. Sheftel<sup>6</sup>, Peiqing Wang<sup>2</sup>, Zunyi Wang<sup>2</sup>, Dale E. Bjorling<sup>2</sup>, William A. Ricke<sup>7</sup>, Weiping Tang<sup>7</sup>, Laura L. Hernandez<sup>8</sup>, Janet R. Keast<sup>9</sup>, Adrian D. Bonev<sup>10</sup>, Matthew D. Grimes<sup>7</sup>, Douglas W. Strand<sup>4</sup>, Nathan R. Tykocki<sup>11</sup>, Robyn L. Tanguay<sup>3</sup>, Richard E. Peterson<sup>1,5</sup> and Chad M. Vezina<sup>1,2,\*</sup>

**ABSTRACT**

Benign prostatic hyperplasia/lower urinary tract dysfunction (LUTD) affects nearly all men. Symptoms typically present in the fifth or sixth decade and progressively worsen over the remainder of life. Here, we identify a surprising origin of this disease that traces back to the intrauterine environment of the developing male, challenging paradigms about when this disease process begins. We delivered a single dose of a widespread environmental contaminant present in the serum of most Americans [2,3,7,8 tetrachlorodibenzo-*p*-dioxin (TCDD), 1 µg/kg], and representative of a broader class of environmental contaminants, to pregnant mice and observed an increase in the abundance of a neurotrophic factor, artemin, in the developing mouse prostate. Artemin is required for noradrenergic axon recruitment across multiple tissues, and TCDD rapidly increases prostatic noradrenergic axon density in the male fetus. The hyperinnervation persists into adulthood, when it is coupled to autonomic hyperactivity of prostatic smooth muscle and abnormal urinary function, including increased urinary frequency. We offer new evidence that prostate neuroanatomical development is malleable and that intrauterine chemical exposures can permanently reprogram prostate neuromuscular function to cause male LUTD in adulthood.

**KEY WORDS:** Dioxin, Noradrenergic, Prostate, Smooth muscle, Artemin, Lower urinary tract dysfunction

**INTRODUCTION**

Benign prostatic hyperplasia/lower urinary tract dysfunction (LUTD) is nearly universal in aging men. If untreated, LUTD can cause permanent bladder dysfunction, renal injury and even death (Lepor, 2005). LUTD is linked to excessive prostate/bladder neck smooth muscle tone, which causes outlet resistance and is the target of  $\alpha$ -adrenergic receptor blockers, a first-line therapy for male LUTD. Aging-related processes such as benign prostatic enlargement have been the sole focus of male LUTD research for decades. Almost no attention has been directed to the first three decades of postnatal life or the intrauterine environment, where chemical exposures and other factors are known risk modifiers for a growing spectrum of aging-related diseases, including hypertension, diabetes, cancer and others (Potischman and Troisi, 1999; Langley-Evans, 2001; Simmons et al., 2001).

2,3,7,8 tetrachlorodibenzo-*p*-dioxin (TCDD) is a widespread contaminant (Gupta et al., 2006). It is the most potent agonist of the aryl hydrocarbon receptor (AHR), a ligand-induced transcription factor that mediates most of TCDD's biological actions (Okey et al., 1994). TCDD is used experimentally to model AHR activation by other common environmental contaminants, including polychlorinated dibenzofurans (PCDFs), polychlorinated dibenzodioxins (PCDDs), polychlorinated biphenyls (PCBs), polycyclic aromatic hydrocarbons (PAHs) and heteroaromatic amines (HAAs) (Powell and Ghotbaddini, 2014; Organtini et al., 2017). These chemicals are introduced into the environment through manufacturing and combustion processes, and human exposure occurs through dietary consumption of contaminated foods, such as red meat, dairy and fish, and other sources, such as air pollution (Powell and Ghotbaddini, 2014). Dioxin-like AHR agonists are ubiquitous in the serum of pregnant women, where they can pass through the placenta to expose the developing fetus (Wang et al., 2009; Woodruff et al., 2011). The average background body burden of TCDD equivalents in the general human population is 0.013 µg/kg (DeVito et al., 1995). Human populations with documented exposure have higher body burdens of TCDD equivalents, 0.096–7.0 µg/kg, and adverse health effects have been associated with them (DeVito et al., 1995). A body burden of TCDD equivalents of 2.13 µg/kg in pregnant women is associated with decreased birth weight (Sunahara et al., 1987; Lucier, 1991), decreased growth (Guo et al., 1994) and delayed developmental milestones (Rogan et al., 1988; Chen et al., 1992) in

<sup>1</sup>Molecular and Environmental Toxicology Center, University of Wisconsin-Madison, Madison, WI 53705, USA. <sup>2</sup>Department of Comparative Biosciences, University of Wisconsin-Madison, Madison, WI 53705, USA. <sup>3</sup>Department of Environmental and Molecular Toxicology, Oregon State University, Corvallis, OR 97331, USA. <sup>4</sup>Department of Urology, University of Texas Southwestern, Dallas, TX 75390, USA. <sup>5</sup>School of Pharmacy, University of Wisconsin-Madison, Madison, WI 53705, USA. <sup>6</sup>Cellular and Molecular Pharmacology, University of Wisconsin-Madison, Madison, WI 53705, USA. <sup>7</sup>Department of Urology, University of Wisconsin-Madison, Madison, WI 53705, USA. <sup>8</sup>Department of Animal and Dairy Sciences, University of Wisconsin-Madison, Madison, WI 53705, USA. <sup>9</sup>Department of Anatomy and Physiology, University of Melbourne, Melbourne, VIC 3010, Australia. <sup>10</sup>Department of Pharmacology, University of Vermont, Burlington, VT 05405, USA. <sup>11</sup>Department of Pharmacology and Toxicology, Michigan State University, East Lansing, MI 58823, USA.

\*Author for correspondence (chad.vezina@wisc.edu)

© A.E.T., 0000-0002-8204-6162; S.R.O., 0000-0002-1962-8696; K.P.K.S., 0000-0002-7006-9420; C.L.D., 0000-0001-7808-3860; D.B.J., 0000-0002-0587-9558; N.M.G., 0000-0002-2054-4430; A.J.S., 0000-0002-3111-0216; C.M.S., 0000-0002-6096-1626; D.E.B., 0000-0003-4680-7670; W.A.R., 0000-0002-9807-2090; W.T., 0000-0002-0039-3196; L.L.H., 0000-0001-7591-5203; J.R.K., 0000-0002-4341-3265; M.D.G., 0000-0002-4409-9263; D.W.S., 0000-0002-0746-927X; N.R.T., 0000-0001-5432-7656; R.L.T., 0000-0001-6190-3682; C.M.V., 0000-0001-7058-5399

This is an Open Access article distributed under the terms of the Creative Commons Attribution License (<https://creativecommons.org/licenses/by/4.0>), which permits unrestricted use, distribution and reproduction in any medium provided that the original work is properly attributed.

Handling Editor: Steven J. Clapcote  
Received 15 April 2021; Accepted 15 June 2021

their offspring. The TCDD dose used in pregnant mice in the present study, 1.0  $\mu\text{g}/\text{kg}$ , is in the same maternal dose range of TCDD equivalents that disrupts child health.

We offer new evidence that the LUTD disease process can be initiated far earlier than previously considered. Using bulk RNA sequencing (RNA-seq) of the fetal prostate, we discovered that TCDD exposure coinciding with the onset of prostate innervation (Turco et al., 2019) increases abundance of the neurotrophic/survival factor artemin (*Artn*), which was previously shown to be critical for noradrenergic axon development (Baloh et al., 1998; Honma et al., 2002). TCDD rapidly increases noradrenergic axon density in the fetal prostate. Whereas fetal changes in innervation are often resolved by axon pruning, TCDD-mediated prostate hyperinnervation is durable and continues into adulthood, when it is functionally coupled to prostate smooth muscle hyperactivity and LUTD. Our results draw new attention to the perinatal environment as a factor that shapes adult male voiding function and serves as a risk modifier for LUTD in advancing age.

## RESULTS

### Fetal TCDD exposure changes urinary voiding function in adulthood

The intrauterine environment has been linked to multiple aging-related diseases, and maternal chemical exposures during pregnancy are risk modifiers for these diseases. For example, AHR activation by TCDD or related chemicals in the fetus has been linked to increased risk for eczema (Ye et al., 2018), autoimmune diseases (Gogal and Holladay, 2008), neurodevelopmental disorders (Pham et al., 2019) and impairment of mammary gland differentiation (Vorderstrasse et al., 2004), as well as others. To test whether fetal TCDD exposure changes urinary function in adult male mice, a single dose of TCDD (1  $\mu\text{g}/\text{kg}$ , oral maternal dose) was given at embryonic day (E)13.5 (resulting in continuous exposure beginning *in utero* and throughout lactation), and urinary function was evaluated by cystometry in anesthetized male mice on postnatal day (P)90–P98. TCDD exposure resulted in significantly reduced intervoid interval (Fig. 1), whereas peak voiding pressure was not significantly changed (Fig. S1A).

### Fetal TCDD exposure increases the sensitivity of adult prostatic smooth muscle to electrically evoked contraction

TCDD exposure is associated with prostatic smooth muscle hypertrophy in adult mice and rhesus macaques (Arima et al., 2010; Rieke et al., 2016; Turco et al., 2020). Smooth muscle hyperactivity can drive hypertrophy; therefore, we tested whether TCDD exposure increases nerve-evoked prostate muscle contraction. We introduced a genetically encoded calcium sensor (GCaMP) into prostate smooth muscle to quantify calcium transients. *Myh11<sup>cre/+</sup>;GCaMP5g/+* male mouse fetuses were exposed to TCDD or vehicle (control) on E13.5, as previously described, and euthanized at P90–P98. Excised lower urinary tracts (anterior lobes removed and dorsal prostate lobes attached to urethra) were transferred to a heated perfusion bath, and prostate preparations were stimulated with trains of 0.5 ms pulses at 60 V with 0.1 Hz (below the frequency leading to half-maximum response) (Lau et al., 1998) while continuously recording tissue fluorescence (Movies 1 and 2). Stimulated tissues increase in fluorescence and eventually return to baseline fluorescence. TCDD significantly decreases the rise time in field stimulation-induced calcium fluorescence, with TCDD-treated tissues reaching peak fluorescence (maximal contraction) more quickly than controls. Rise time is an index of muscle sensitivity; peak fluorescence does

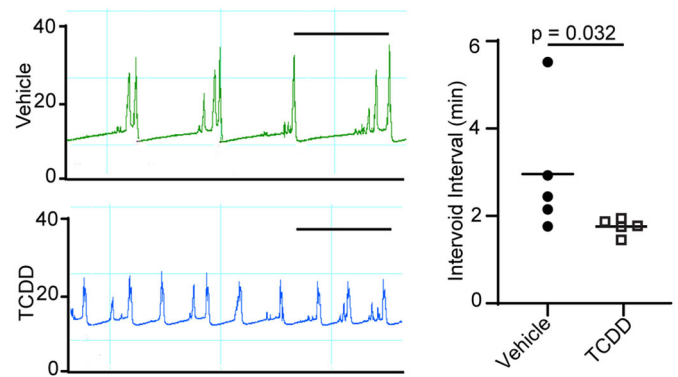

**Fig. 1. A single dose of TCDD, delivered to male mice during development, changes urodynamic voiding behavior in adulthood.**

C57BL/6J mouse fetuses were exposed to a single dose of TCDD [1  $\mu\text{g}/\text{kg}$  maternal dose, orally (po)] or vehicle (5 ml/kg corn oil, po, control) on E13 and were evaluated by cystometry between P90 and P98. Mice were anesthetized, a cystostomy catheter was passed through the bladder dome, and saline was infused at a rate of 1.5 ml/h while continuously measuring bladder pressure in response to filling and emptying. The left panel shows representative pressure versus time traces (top, vehicle; bottom, TCDD), with each peak indicating bladder contraction during a voiding event. The y-axes indicate changes in intravesical pressure (mmHg). Three to five consecutive voids were used to quantify mean responses. *In utero* and lactational TCDD exposure decreases the intervoid interval. Results are from five mice per group, representing at least three independent litters. Scale bars: 2.5 min. The intervoid intervals are quantified in the right panel. Unpaired Student's *t*-test was used to identify differences between groups after a log transformation to normalize distribution. Results are from five mice per group, representing at least three independent litters.

not change with treatment but the time to reach the maximal contraction is significantly less in TCDD-exposed animals. *In utero* and lactational TCDD exposure also increased the percentage of prostate ducts with detectable changes in ductal diameter in response to field stimulation (Fig. 2).

We complemented imaging experiments with isometric contractility assays to measure prostate smooth muscle tension in response to graded field stimuli. TCDD exposure significantly increased dorsal prostate tension in response to 0.1, 3, 10 and 60 Hz stimuli (Fig. 2E). We tested whether noradrenaline specifically mediates the TCDD-induced response in the dorsal prostate by blocking the release of catecholamines (including norepinephrine) from autonomic axons with the addition of sympatholytic guanethidine to the tissue bath (1.983  $\mu\text{g}/\text{ml}$ ) (Lau et al., 1998). Guanethidine pretreatment significantly attenuated TCDD-mediated enhancement of prostate field stimulation (Fig. 2F). The residual response is potentially due to a cholinergic-mediated contraction (White et al., 2010). The actions of TCDD also exhibited regional specificity for prostate and prostatic urethra, which are under noradrenergic control. The contractile response of the bladder, which is primarily mediated by cholinergic rather than noradrenergic mechanisms, was unchanged by TCDD exposure (Fig. S1B).

From these results, we surmised that TCDD could act through two mechanisms: it could directly enhance noradrenergic transmission, or it could increase the sensitivity of prostate smooth muscle adrenoceptors to agonists. Dorsal prostate tension response to increasing concentrations of phenylephrine (0.0001–200  $\mu\text{M}$ ) is unchanged after TCDD exposure, ruling out a change in smooth muscle adrenergic sensitivity (Fig. S1C). Thus, we conclude that

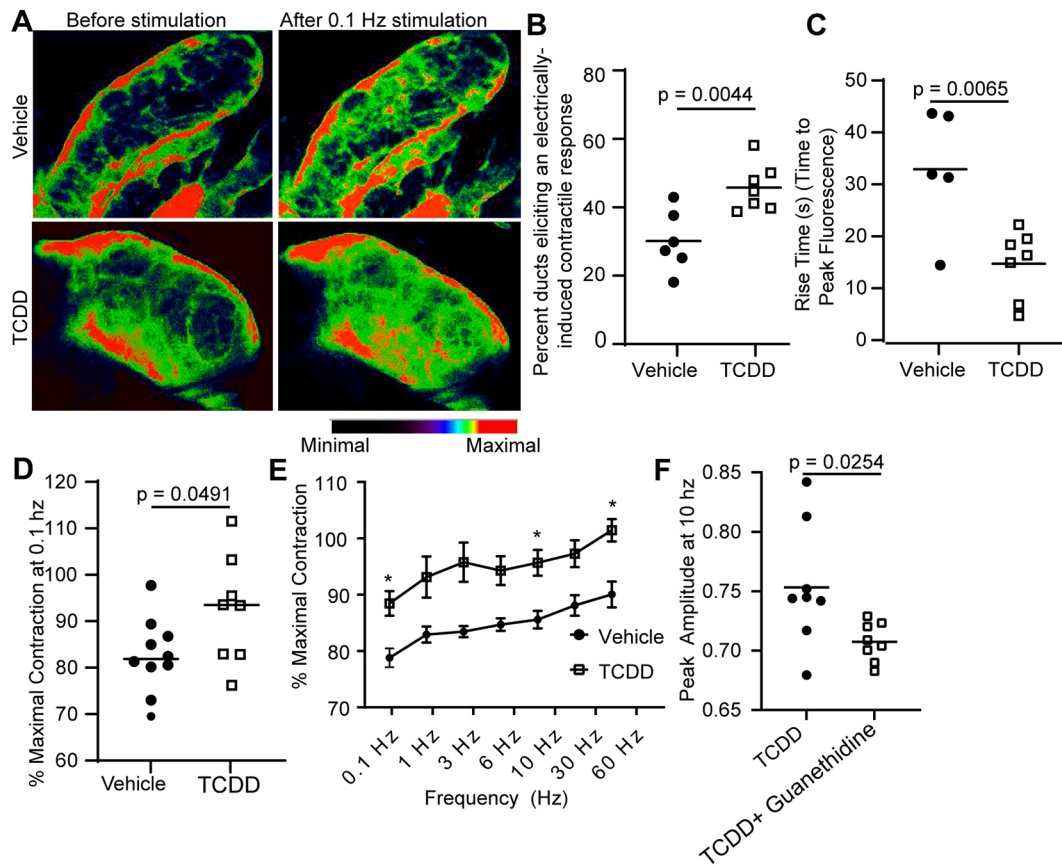

**Fig. 2. A single dose of TCDD, delivered to male mice during the perinatal period, increases adult prostatic smooth muscle responsiveness to field stimulation.** E13 *Myh11<sup>Cre/+</sup>;GCaMP5g/+* male mice were exposed to TCDD (1  $\mu$ g/kg maternal dose, po) or vehicle (5 ml/kg, po, control). For A-D, prostates were collected between P90 and P98 and placed in a perfusion chamber with 37°C HEPES buffer. (A) Representative fluorescent images were captured at baseline and (contracted) 40 s after a 0.1 Hz stimulus. (B,C) *In utero* and lactational TCDD exposure of *Myh11<sup>Cre/+</sup>;GCaMP5g/+* mice increases the percentage of prostatic ducts that elicit a change in diameter (contraction) in response to a 0.1 Hz stimulus (B) and reduces the time needed to reach peak fluorescence (C). (D-F) In separate experiments, field stimulation was applied to tensioned adult dorsal prostate tissue incubated in 37°C Krebs buffer. (D) *In utero* and lactational TCDD exposure increases the maximum response to 0.1 Hz stimulation compared to vehicle-exposed dorsal prostate tissue. (E) *In utero* and lactational TCDD exposure increases the contractile response to 0.1, 10 and 60 Hz stimuli compared to control with a repeated measures two-way ANOVA ( $*P \leq 0.05$ ). (F) Pretreatment with 10  $\mu$ M guanethidine decreased the maximal response of TCDD-exposed tissues to field stimulation. The peak amplitude at 10 Hz is shown as an example indicating that axons are responsible for TCDD-induced sensitization. Results are from six to ten mice per group, representing at least three independent litters. Unpaired Student's *t*-test was used to identify differences between groups.

TCDD exposure enhances the magnitude and duration of adrenergic outflow within the prostate.

#### **A single dose of TCDD at E13.5 increases prostate noradrenergic axon density beginning in the fetal period and persisting into adulthood**

Men with LUTD often present with autonomic imbalance characterized by decreased high-frequency heart rate variability; the mechanism for this imbalance is not known but could derive from an underlying difference in neuroanatomy (Choi et al., 2010). Recent studies demonstrate that prostate axon density is modifiable. For example, the prostate tumor microenvironment increases the density of parasympathetic cholinergic axons (Magnon et al., 2013). We next tested whether TCDD exposure influences prostate noradrenergic axon density. Mice were treated with TCDD or vehicle, as previously described, and adult (P90) prostate tissue sections were evaluated by immunostaining. Noradrenergic axons were labeled with antibodies against tyrosine hydroxylase (TH) and quantified in the 10  $\mu$ m periductal region of prostate stromal tissue extending outward from cadherin 1 (CDH1)-stained prostate epithelium (Fig. 3A). We focused specifically on the periductal region, as it contains most of

the prostate periductal smooth muscle (Turco et al., 2019). *In utero* and lactational TCDD significantly increased noradrenergic axon density in the dorsal prostate, suggesting that TCDD modifies axon patterning during organ development (Fig. 3A).

Noradrenergic axons are first evident in the mouse prostate at E13.5 (Turco et al., 2019), coinciding with the initiation of TCDD exposure. We next tested whether TCDD acts through a developmental mechanism to increase prostate noradrenergic axon density. To pinpoint the stage of life when TCDD first increases noradrenergic axon density, mice were treated at E13.5 with TCDD or vehicle, and axons were quantified at two time points: (1) P9, coinciding with active prostate ductal branching morphogenesis and when noradrenergic axons are most dense (Turco et al., 2019); and (2) E17.5, during prostate bud initiation (Lin et al., 2004). TCDD exposure significantly increased noradrenergic axon density at both P9 (Fig. 3B) and E17.5 (Fig. 3C). Thus, TCDD exposure beginning on E13.5 increases prostate noradrenergic axon density during the fetal and perinatal periods, and this change persists at least to adulthood.

TCDD actions on prostate axon density are not caused by changes in prostate size, as TCDD did not significantly change ventral,



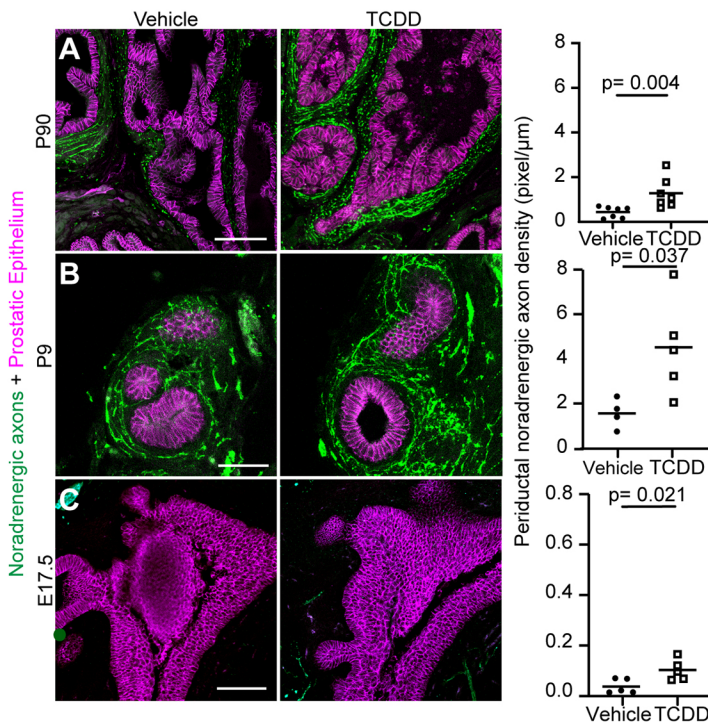

**Fig. 3. A single perinatal dose of TCDD increases noradrenergic axon density in the prostatic periductal region beginning in the fetal period and persisting into adulthood.** (A–C) Male mice were exposed to TCDD (1  $\mu\text{g}/\text{kg}$ , po) or vehicle (5 ml/kg, po, control) at E13.5, and noradrenergic axon density was assessed immunohistochemically in a dorsal prostate tissue sections (three non-serial sections per animal) at P90 (seven mice per group) (A), P9 (four to five mice per group) (B) and E17.5 (five mice per group) (C). Results are from at least three independent litters per group. An antibody against tyrosine hydroxylase (TH; green) was used to identify noradrenergic axons and an antibody against cadherin 1 (CDH1; magenta) was used to localize prostatic epithelium. TH<sup>+</sup> axons were quantified in the area extending 10  $\mu\text{m}$  from prostatic epithelium. Vehicle groups at P9–P90 differ in density due to different tissue structures in neonatal versus adult prostate. Scale bars: 50  $\mu\text{m}$  for P50 and P9, 100  $\mu\text{m}$  for E17.5. Unpaired Student's *t*-test was used to identify differences between groups, and  $P \leq 0.05$  was considered significant. Results are from four to seven mice per group, representing at least three independent litters.

anterior, or dorsal prostate weights or body weights (Fig. S1D,E). Furthermore, TCDD actions on prostate innervation appear to be selective for noradrenergic axons. *In utero* and lactational TCDD exposure does not change immunopositive axon pixel densities at P90, P9 or E17.5 for markers of sensory axons [calcitonin gene-related peptide (CGRP)], a pan-axonal marker [ $\beta$ III tubulin (TUBB3)] or cholinergic axons [vesicular acetylcholine transporter (VAcHT; also known as SLC18A3)] (Figs S2–S4).

#### Fetal TCDD exposure increases prostate mRNA abundance of *Artn*, a neurotrophic factor linked to axon recruitment

Because TCDD exposure increases prostate axon density during the period when axons project to the prostate, we used RNA-seq to survey the genomic response to TCDD and test whether TCDD induces neurotrophins/neurotrophic factors. We focused on the epithelium, because it is a considerable source of neurotrophins/neurotrophic factors in other developing organs (de Groat, 2013) and shifted the timing of TCDD exposure to coincide with prostate specification, the period when axons are actively recruited (Vezina et al., 2008a,b). We also increased the TCDD dose to increase the dynamic range of the transcriptional response. A single maternal dose of 5  $\mu\text{g}/\text{kg}$  TCDD was delivered on E15.5, and fetal prostate epithelium was collected at E16.75 for RNA-seq analysis (Fig. 4A, B). TCDD exposure initially led to the differential expression of 3276 genes in fetal prostate epithelium (Fig. 4A; Dataset 1). To focus on the most biologically relevant changes while reducing the number of false positives, differential expression was determined using a threshold  $\log_2(1.5)$  fold-change cutoff, which resulted in 573 significantly differentially expressed genes [ $n=3-4$ , Benjamini–Hochberg false discovery rate (FDR)-adjusted  $P < 0.05$ ; Dataset 1]. *Artn*, a member of the glial cell-derived neurotrophic factor family that recruits noradrenergic axons, was among the top 20 most differentially expressed genes by TCDD ordered by FDR-adjusted  $P$ -value [ $\log_2(\text{fold change})=2.51$ ,  $n=3-4$ , FDR-adjusted  $P=1.55 \times 10^{-6}$ ; Fig. 4B; Dataset 1]. To validate the RNA-seq results and enhance rigor, we copied the TCDD dose and timing

used in Figs S1–S3 (1  $\mu\text{g}/\text{kg}$  maternal dose at E13.5) to evaluate TCDD-mediated changes in *Artn*. We used RNAScope to localize *Artn* mRNA in E17.5 urogenital sinus (UGS) epithelium of TCDD and vehicle samples and peri-epithelial mesenchyme (Fig. 4C), the same regions in which fetal TCDD exposure activates the AHR (Vezina et al., 2008a,b). We used reverse transcriptase polymerase chain reaction (RT-PCR) to confirm that TCDD increases *Artn* mRNA abundance in the E17.5 male UGS (Fig. 4D). We also showed that the TCDD-mediated increase in *Artn* mRNA abundance is transient; it is limited to the fetal period and is no longer differentially regulated in the P9 prostate (Fig. S5).

Our results support a model by which TCDD exposure during urogenital development in the fetus induces *Artn* to enhance noradrenergic axon recruitment to the developing prostate, thereby increasing the basis for a larger response to sympathetic nerve activation and driving a change in urinary function that persists into adulthood (Fig. 5). We propose this mechanism as a means by which the intrauterine environment can influence baseline urinary physiology and serve as a risk factor for LUTD in aging men.

#### DISCUSSION

Chemical exposures during the fetal and neonatal periods influence risk of adult obesity, neurodevelopmental disorders and some forms of cancer (Levin et al., 1988; Grandjean and Landrigan, 2006; Carpenter and Bushkin-Bedient, 2013), but their impact on male urinary function during advancing age has largely been unexamined. Using perinatal exposure to a persistent environmental contaminant (TCDD) as a model for exposure to a range of common environmental contaminants that activate the AHR, we find that the intrauterine and early postnatal environment shapes prostate noradrenergic axon density, leading to lasting changes in prostate smooth muscle response and voiding function that persist into adulthood. It is unclear why prostate baseline tension, smooth muscle activity and responsiveness to  $\alpha$ -adrenergic receptor blockers varies so considerably among human males with LUTD (Lee et al., 2017). We posit that maternal chemical exposures during

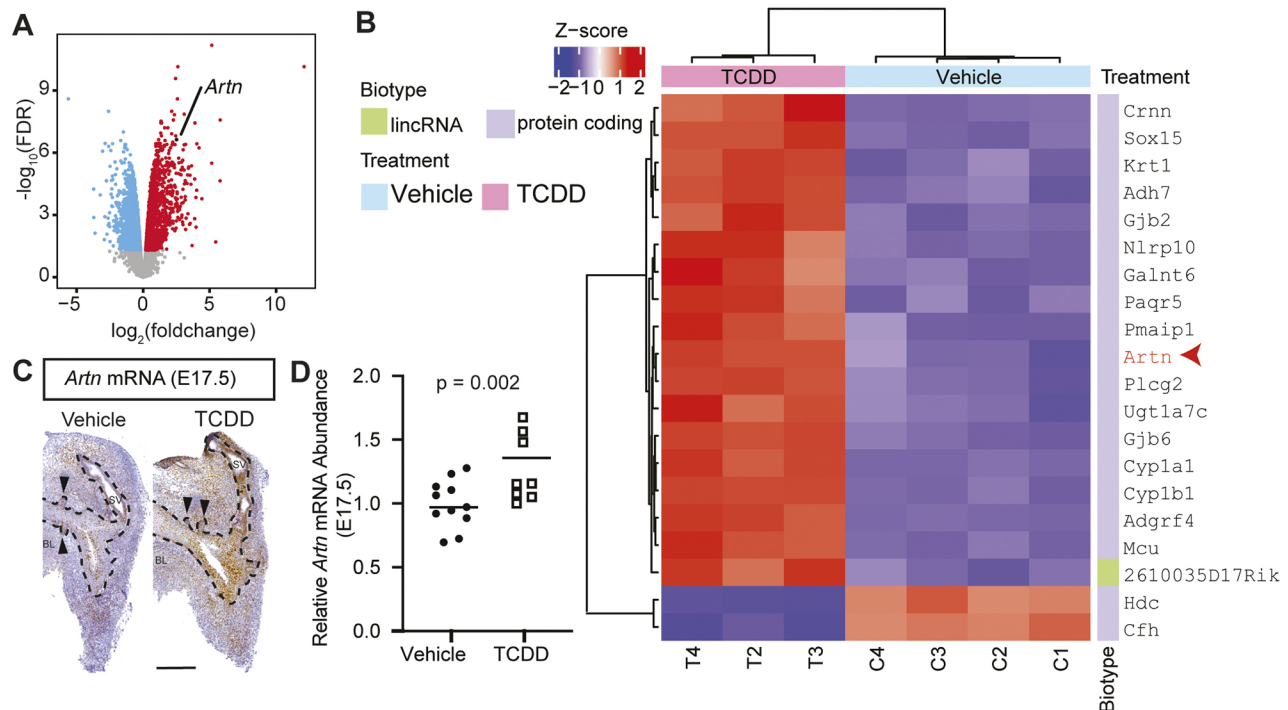

**Fig. 4. In utero TCDD exposure, coinciding with the beginning of prostatic neuroanatomical development, increases mRNA abundance of the GDNF member *Artn* in the fetal prostate.** Male mice were exposed to TCDD (5  $\mu\text{g}/\text{kg}$ , po maternal dose) or vehicle (5 ml/kg, po maternal dose, control) on E13.5, and urogenital sinus (UGS) epithelium was collected for RNA-seq on E16.75. (A) Volcano plot showing significantly up- and downregulated genes from TCDD exposure. Red indicates upregulated genes, blue indicates downregulated genes, and *Artn* is identified in black ( $n=3-4$ , FDR-adjusted  $P \leq 0.05$ ). (B) The top 20 differentially expressed genes, ordered by FDR-adjusted *P*-value, included *Artn*. (C) *In situ* hybridization localized *Artn* mRNA (brown staining) to UGS epithelium and periprostatic bud mesenchyme of E17.5 (control) C57BL/6J male fetuses. BL, bladder; SV, seminal vesicle; arrowhead, prostatic bud; the dashed line indicates the boundary between UGS epithelium and mesenchyme. (D) Real-time RT-PCR indicated that a single maternal dose of TCDD (1  $\mu\text{g}/\text{kg}$ , po) on E13.5 significantly increased *Artn* mRNA abundance in the E17.5 male UGS compared to vehicle. Scale bar: 250  $\mu\text{m}$ . Unpaired Student's *t*-test was used to assess differences in RT-PCR data, and differential expression of genes was determined using functions from edgeR, the Cox-Reid profile-adjusted likelihood method to calculate dispersions, empirical Bayes quasi-likelihood *F*-tests, and a version of the *t*-tests relative to a threshold (TREAT) method. Results are from eight to 11 male fetuses per group, representing three independent litters, and  $P \leq 0.05$  was considered significant.

fetal urogenital development may underlie this variability, creating a susceptible phenotype that sensitizes males to voiding dysfunction with advancing age. In support of this concept, TCDD exposure worsens urinary voiding dysfunction in mice challenged in adulthood with exogenous testosterone and estradiol implants (Ricke et al., 2016). Here, we show that TCDD exposure is, by itself, sufficient to change urinary voiding dynamics in the absence of exogenous hormone challenge and can predispose to voiding dysfunction, even in young adult mice. We describe increased noradrenergic axon density and prostate smooth muscle hyperactivity as a mechanism for abnormal voiding in adulthood and for hypersensitivity of TCDD-exposed mice.

Exposure of the fetus to TCDD during the period when noradrenergic axons are recruited into the prostate (Turco et al., 2019) increases abundance of *Artn*, a neurotrophic factor driving noradrenergic axon guidance and growth. ARTN mediates sympathetic axon growth along vasculature at the time of initial axon extension, induces sympathetic axon outgrowth *in vitro*, and attracts sympathetic axons *in vitro* and *in vivo* (Enomoto et al., 2001; Glebova and Ginty, 2005). Mice deficient in *Artn* exhibit abnormally short or misdirected proximal axons from sympathetic chain ganglia (Honma et al., 2002). More than 50% of sympathetic neurons generated in the embryo are killed by apoptosis during normal development (Oppenheim, 1991). One hypothesis for why

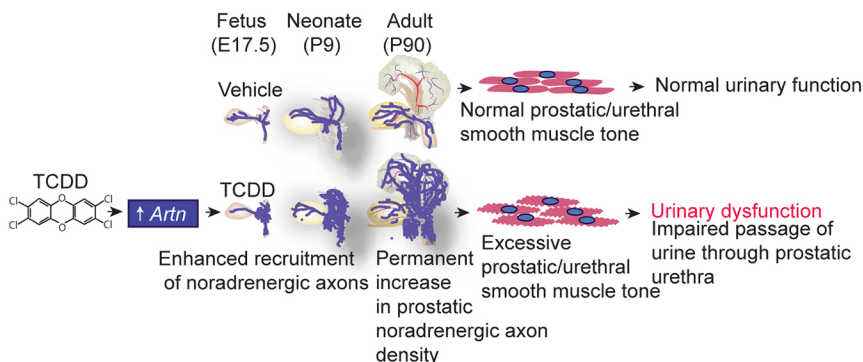

**Fig. 5. Proposed mechanism underlying TCDD-induced urinary dysfunction in mice.** TCDD increases the abundance of the neurotrophic factor *Artn* in the developing prostate and enhances noradrenergic axon growth. These TCDD actions increase prostatic noradrenergic density in the fetus, neonate and adult, and lead to prostatic smooth muscle hyperactivity and urinary dysfunction in adulthood.

excessive innervation is a widespread activity in the developing embryo is that neurons are initially overproduced and, once they innervate their target, compete for limited target-derived neurotrophic factors (Levi-Montalcini et al., 1954). Our data point to TCDD exposure increasing *Artn* expression, in turn leading to persistent hyperinnervation. We localized *Artn* within fetal mouse prostate and used independent methods and two separate mouse cohorts to show that TCDD increases *Artn* mRNA abundance in the fetal prostate. TCDD is a potent ligand of the AHR, a ligand-dependent transcription factor that mediates most, if not all, of TCDD's biological actions (Edamitsu et al., 2019). Promoting the idea that *Artn* induction is a more generalizable mechanism of AHR action, a recent study found that the activated AHR docks at the *Artn* gene locus, increases *Artn* expression and drives hyperinnervation of adult mouse skin (Hidaka et al., 2017).

A surprising observation in this study is the persistence of the prostate hyperinnervation phenotype induced by fetal TCDD exposure, beginning in the fetal period and continuing into adulthood. *Artn* is transiently upregulated at E17.5; however, we cannot rule out the possibility that TCDD-mediated increases in neurotrophic pathways at later time points also contribute to the persistent increase in prostatic axon density. Other neurotrophic factors such as neuropilin 1, neuropilin 2 and semaphorin 3a (SEMA3A) also control rat and mouse sympathetic axon growth, guidance and remodeling (Nangle and Keast, 2011; Maden et al., 2012; Richeri et al., 2020). TCDD acts through SEMA3A to disrupt the peripheral nervous system of the red seabream (Iida et al., 2013). It is also interesting that the TCDD-mediated transient increase in fetal prostatic *Artn* expression is associated with increased density of sympathetic, but not sensory, axons in the prostate. One possibility is that glial cell line-derived neurotrophic factor family receptor alpha 3 (GFRA3; a major receptor for ARTN) is more abundant in noradrenergic axons than in sensory and cholinergic axons of the developing prostate, a possibility that will be explored in future studies. Based on our findings, we predict that fetal exposure to AHR agonists would induce benign prostatic changes and LUTD without causing pelvic pain, although further investigation is required.

To further define the mechanism underpinning sympathetic hyperinnervation of the prostate, it would be of interest to investigate the potentially persistent effects of TCDD exposure on pelvic ganglia, as these are the primary source of sympathetic axons innervating the prostate and other pelvic organs. This approach could determine whether TCDD drives hyperinnervation by stimulating the postnatal maturation of pelvic ganglia (in which the number of neurons normally continues to increase in the first couple of weeks after birth). Alternatively, TCDD may also stimulate the growth of axon collaterals within the prostate. We previously observed that axon density in the mouse prostate continuously increases from the fetal period to adulthood (Turco et al., 2019). If chemical exposure causes excessive noradrenergic axons to grow within the developing prostate, and this aberrant growth persists postnatally and into adulthood, this may be a fundamental generalizable mechanism of urinary voiding dysfunction in aging men and influence the symptomatic response to inflammation and therapeutic response to  $\alpha$ -adrenergic receptor blockers. It is important to note that several chemicals have been implicated in abnormal prostate development, including environmental, pharmaceutical and dietary estrogens (Saito et al., 2000; Timms et al., 2005), plasticizers (Moore et al., 2001) and bacterial toxins (Zhang et al., 2017), among others. Whether these other chemicals influence innervation of the prostate has not been

determined. Investigation of the impact of other AHR agonists on prostate innervation would be of significant interest and relevance to LUTD.

## MATERIALS AND METHODS

### Mice

All mice were purchased from The Jackson Laboratory (Bar Harbor, ME, USA) and maintained on a C57BL/6J genetic background (stock #000664), *Polr2a*<sup>Tn(pb-CAG-GCaMP5g,-tdTomato)Tvrtd</sup> (also known as *GCaMP5g*; stock #024477) and Tg(*Myh11cre*,-EGFP)2Mik (also known as *Myh11*<sup>cre</sup>; stock #007742). Mice were housed in Innovive<sup>®</sup> HDPE plastic microisolator cages in a room maintained on a 12 h light and dark cycle, ambient temperature of 20.5±1°C, and relative humidity of 30-70%. Mice were fed a 5015 Diet (PMI Nutrition International, Brentwood, MO, USA) from conception through weaning (P21) and an 8604 Teklad Rodent Diet (Harlan Laboratories, Madison, WI, USA) thereafter. Food and water were available *ad libitum*, and cages contained corncob bedding. Mice were time-mated by pairing males and females overnight. The morning of definitive copulatory plug identification was considered E0. For all studies other than RNA-seq, mated females with a body weight increase of 4 g at 13 days post-breeding (indicating pregnancy) (Heyne et al., 2015) were given a single dose of TCDD [1 µg/kg, orally (po), 98% purity; Cambridge Isotope Laboratories, Andover, MA, USA] or corn oil (5 ml/kg, po; vehicle control) on E13.5. TCDD or vehicle was administered using a reusable 12-gauge, 1.5 inch animal feeding/oral gavage needle (VWR International, 20068-636). The TCDD dose used in this study matches that of a previous reference study (Moore et al., 2016). Based on the 11-day whole-body elimination half-life of TCDD in C57BL/6J mice, the TCDD dosing paradigm used in this study results in continuous TCDD exposure from the fetal period through weaning (Gasiewicz et al., 1983). All mice were euthanized by CO<sub>2</sub> asphyxiation. UGS and prostate tissues were collected at E17.5, P9 and P90-P98, either snap frozen in liquid nitrogen or fixed overnight at 4°C in 4% paraformaldehyde dissolved in neutral buffered saline (Thermo Fisher Scientific) and dehydrated through a series of graded ethanol concentrations. Tissues were cleared in xylenes, embedded in paraffin wax and sectioned at 10 µm thickness on a microtome (Surgipath Medical Industries).

### Cystometry in anesthetized adult male mice

Cystometry was performed as previously described (Bjorling et al., 2015; Ritter et al., 2017; Ruetten et al., 2019). Mice were anesthetized with urethane [1.43 g/kg, subcutaneous (sc)], because isoflurane interferes with normal micturition, and rested for 30 min. Mice remained under urethane anesthesia for the duration of performance of cystometry. The deep plane of anesthesia was confirmed by repeatedly confirming the absence of response to toe pinch during cystometry. An incision was made in the ventral abdomen to expose the bladder. A purse string suture was placed in the bladder dome, and polyethylene cystometry tubing (PE-50; outer diameter, 0.58 mm; inner diameter, 0.28 mm) was inserted into the bladder through the center of the suture and secured. The abdominal wall and skin were closed, and the exterior tubing was sutured to the abdominal skin to prevent movement. Mice were allowed to recover on a heating pad for 1 h post procedure. The exposed tubing was attached to a three-way stopcock and connected to an infusion pump (Harvard Apparatus, Holliston, MA, USA) and pressure transducer (Memscep). Bladder pressure was simultaneously recorded using a PowerLab data collection system (ABInstruments, Colorado Springs, CO, USA). Saline (0.9%) was infused into the bladder at a rate of 1.5 ml/h. At least 1 h of voiding activity was recorded. Three to five consecutive voids, occurring after stabilization of micturition cycles, were used for analysis.

### Smooth muscle calcium transient imaging

*Myh11cre*<sup>+/+</sup>;*GCaMP5g*<sup>+/+</sup> mice harbor a genetically encoded calcium sensor that fluoresces in response to increases in intracellular calcium concentration. *Myh11*<sup>cre</sup><sup>+/+</sup>;*GCaMP5g*<sup>+/+</sup> mice were euthanized at 14 weeks of age, and a tissue complex containing urethra and anterior, dorsal and ventral prostate was dissected and stored in ice-cold HEPES buffer (134 mM





gene transfer format (GTF) file ([https://ftp.ensembl.org/pub/release-100/gtf/mus\\_musculus/Mus\\_musculus.GRCm38.100.gtf.gz](https://ftp.ensembl.org/pub/release-100/gtf/mus_musculus/Mus_musculus.GRCm38.100.gtf.gz)). The extracted genomic information was incorporated into HISAT2 index files, using the hisat2-build command. After building enhanced genome index files, trimmed reads were aligned with HISAT2 v2.1.0 and then piped through SAMtools v1.10 (Li et al., 2009) to convert aligned reads to binary alignment style (BAM) and then to sort BAM reads by position, using the following command: hisat2 -q -phred33 -ma-strandness- RF --no-mixed --no-discordant --new-summary --threads 9 -x GENOME\_INDEX -1 PAIR1\_FILE.fastq.gz -2 PAIR2\_FILE.fastq.gz | samtools view -u @9 | samtools sort -n -O bam -o OUTPUT\_FILE\_sorted\_byName.bam -@9. Gene counts were estimated using the htseq-count command from HTSeq v0.12.4 (Anders et al., 2015) with the GRCm38.p6 Ensembl 100 GTF annotation (options: --format=bam --order=name --stranded=reverse --type=exon -idattr=gene\_id --additionalattr=gene\_name --mode=intersection-nonempty).

Analysis of gene counts was conducted using R v4.0.2 (<https://www.r-project.org/>, accessed 12 February 2021) and Bioconductor v3.11 (Gentleman et al., 2004; Huber et al., 2015) packages in the RStudio v1.3.959 (<https://www.rstudio.com/>) integrated development environment with a customized script (Dataset 2) based on a maintained Bioconductor workflow package from the Gordon Smyth laboratory (<https://www.bioconductor.org/packages/release/workflows/vignettes/RnaSeqGeneEdgeRQL/inst/doc/edgeRQL.html>, last updated 13 June 2020; Chen et al., 2016). Counts from technical replicates split across sequencing lanes were averaged, and initial exploratory data analysis (i.e. gene variance heatmaps and PCA plots) revealed an outlier TCDD sample, which was removed. The Bioconductor package, edgeR v3.30.3, was used to normalize gene counts and determine differential expression (Robinson and Smyth, 2007, 2008; Robinson and Oshlack, 2010; Robinson et al., 2010; McCarthy et al., 2012; Lun et al., 2016). Briefly, genes were filtered using their filterByExpr function to exclude those with low counts in a minimum number of samples across libraries (Chen et al., 2016; Lun et al., 2016). Filtered genes were then normalized across samples using the trimmed mean of M values (TMM) method to minimize composition bias between libraries (Robinson and Oshlack, 2010). Differential expression of genes was determined using functions from edgeR, which uses the negative binomial generalized linear model extended by quasi-likelihood methods to fit the count data, the Cox-Reid profile-adjusted likelihood method to calculate dispersions, and empirical Bayes quasi-likelihood *F*-tests, while differential expression above a logarithmic fold change threshold of  $\log_2(1.5)$  between experimental and control samples was subsequently determined using a version of the *t*-tests relative to a threshold (TREAT) method (McCarthy and Smyth, 2009; McCarthy et al., 2012; Chen et al., 2014). The 'robust=TRUE' option was used to protect the empirical Bayes estimates against the possibility of outlier genes with wide ranging individual dispersions. Genes with a Benjamini-Hochberg FDR-adjusted  $P \leq 0.05$  were considered significantly differentially expressed. The biomaRt v2.44.1 package was used to connect Ensembl gene identifier information to Ensembl BioMart annotation information (e.g. gene symbols, biotypes), and the volcano plot was made using ggplot2 and ggrepel (Durinck et al., 2005, 2009; Wickham, 2009; <https://rdrr.io/cran/ggrepel/>, accessed 12 February 2021). Heatmaps were made using the R packages dendextend v1.13.4 and ComplexHeatmap v2.4.2 (Durinck et al., 2005, 2009; Galili, 2015; Gu et al., 2016). Heatmap clustering was derived from TMM-normalized, variance-stabilized transformed gene values scaled by *z*-score (Love et al., 2015). Sequencing data and processing details have been deposited in the National Center for Biotechnology Information Gene Expression Omnibus (GEO; accession number GSE1166395).

### RNA isolation and RT-PCR

Neonatal and fetal prostates were homogenized, as described previously (Tengowski et al., 1997). RNA was purified with an Illustra RNeasy spin kit (GE Healthcare, Pittsburgh, PA, USA) and reverse transcribed with a SuperScript III First Strand Synthesis System (Invitrogen, Carlsbad, CA, USA). Real-time RT-PCR was performed in 10.5  $\mu$ l reactions containing 1 $\times$  SsoFast EvaGreen Supermix (Bio-Rad Laboratories, Hercules, CA, USA), 0.48  $\mu$ M PCR primers and 3.75  $\mu$ l cDNA, and amplified using a CFX96 PCR machine (Bio-Rad Laboratories). PCR primers are listed in Table S3, with *Ppia* used as an internal loading control. Relative mRNA abundance was determined by the deltaCt method, as described previously (Livak and Schmittgen, 2001).

### Statistics

The number of mice per group ranged from four to 11, and groups represented at least three independent litters. Power calculations were performed to determine the number of mice needed in each experiment. Statistical analysis was performed using GraphPad Prism 8 (version 8.2.1), and a difference between means was considered significant at  $P \leq 0.05$ . Differences among or between groups were identified using one-sided unpaired Student's *t*-test (intervoid interval, TH<sup>+</sup>, VaChT<sup>+</sup>, TUBB3<sup>+</sup> axon density quantification, GCaMP analysis, tissue bath analysis, RT-PCR), one-way ANOVA (CGRP axon density quantification), repeated measures two-way ANOVA (frequency dose response, guanethidine quantification) and non-linear regression model (least squares, phenylephrine dose response). Bartlett's test was used to determine homogeneity of variance before using ANOVA to determine whether a parametric or nonparametric test could be used. Data that did not meet the criteria for homogeneity of variance or normality were transformed (log or square root). The Grubb's test identified extreme studentized deviates, and significant outliers were excluded from analysis. We concluded that these tissues sections were adjacent to an intramural ganglion, and they were removed from statistical analysis.

### Study approval

All procedures were approved by the University of Wisconsin Animal Care and Use Committee and conducted in accordance with the National Institutes of Health (NIH) Guide for the Care and Use of Laboratory Animals.

### Acknowledgements

We thank Dr Robert Lipinski for careful review and spirited discussion in the formulation of the manuscript.

### Competing interests

The authors declare no competing or financial interests.

### Author contributions

Conceptualization: A.E.T., K.P.K.S., C.L.D., W.A.R., J.R.K., M.D.G., N.R.T., R.E.P., C.M.V.; Methodology: A.E.T., S.R.O., K.P.K.S., T.S.C., N.M.G., A.J.S., J.G., C.M.S., Z.W., D.E.B., W.A.R., J.R.K., A.D.B., D.W.S., N.R.T., R.L.T., C.M.V.; Software: S.R.O., C.L.D., L.L.H., A.D.B., N.R.T.; Validation: A.E.T., Z.W., D.E.B.; Formal analysis: A.E.T., K.P.K.S., C.L.D., T.S.C., N.M.G., P.W., J.R.K., A.D.B., N.R.T.; Investigation: A.E.T.; Resources: D.B.J., D.E.B., L.L.H., A.D.B., R.L.T., C.M.V.; Data curation: A.E.T., S.R.O., C.L.D., D.B.J., T.S.C., A.J.S., J.G., C.M.S., P.W., Z.W., D.W.S., R.L.T.; Writing - original draft: A.E.T., C.M.V.; Writing - review & editing: A.E.T., S.R.O., K.P.K.S., C.L.D., D.B.J., T.S.C., N.M.G., A.J.S., J.G., C.M.S., P.W., Z.W., D.E.B., W.A.R., W.T., J.R.K., A.D.B., M.D.G., D.W.S., N.R.T., R.L.T., R.E.P., C.M.V.; Visualization: A.E.T., C.L.D., D.B.J., D.W.S., N.R.T., C.M.V.; Supervision: J.R.K., M.D.G., C.M.V.; Project administration: A.E.T., C.M.V.; Funding acquisition: W.T., R.E.P., C.M.V.

### Funding

This work was supported by the National Institute of Environmental Health Sciences (F31 ES030968, R01 ES001332, R00 ES029537, T32 ES007015), the National Institute of Diabetes and Digestive and Kidney Diseases (R01 DK119615, K12 DK100022) and the National Institute on Minority Health and Health Disparities (U01 HD094759) of the NIH. The content is solely the responsibility of the authors and does not necessarily represent the official views of the NIH.

### Data availability

RNA-seq data and processing details are available at GEO under accession number GSE1166395.

### References

- Abler, L. L., Mehta, V., Keil, K. P., Joshi, P. S., Flucus, C.-L., Hardin, H. A., Schmitz, C. T. and Vezina, C. M. (2011). A high throughput in situ hybridization method to characterize mRNA expression patterns in the fetal mouse lower urogenital tract. *J. Vis. Exp.* **54**, 2912. doi:10.3791/2912
- Anders, S., McCarthy, D. J., Chen, Y., Okoniewski, M., Smyth, G. K., Huber, W. and Robinson, M. D. (2013). Count-based differential expression analysis of RNA sequencing data using R and Bioconductor. *Nat. Protoc.* **8**, 1765-1786. doi:10.1038/nprot.2013.099
- Anders, S., Pyl, P. T. and Huber, W. (2015). HTSeq—a Python framework to work with high-throughput sequencing data. *Bioinformatics* **31**, 166-169. doi:10.1093/bioinformatics/btu638
- Arima, A., Kato, H., Ise, R., Ooshima, Y., Inoue, A., Muneoka, A., Kamimura, S., Fukusato, T., Kubota, S. and Sumida, H. (2010). In utero and lactational



- exposure to 2,3,7,8-tetrachlorodibenzo-p-dioxin (TCDD) induces disruption of glands of the prostate and fibrosis in rhesus monkeys. *Reprod. Toxicol.* **29**, 317-322. doi:10.1016/j.reprotox.2009.12.007
- Baloh, R. H., Tansley, M. G., Lampe, P. A., Fahrner, T. J., Enomoto, H., Simburger, K. S., Leitner, M. L., Araki, T., Johnson, E. M. and Milbrandt, J. (1998). Artemin, a novel member of the GDNF ligand family, supports peripheral and central neurons and signals through the GFRalpha3-RET receptor complex. *Neuron* **21**, 1291-1302. doi:10.1016/S0896-6273(00)80649-2
- Bjorling, D. E., Wang, Z., Vezina, C. M., Ricke, W. A., Keil, K. P., Yu, W., Guo, L., Zeidel, M. L. and Hill, W. G. (2015). Evaluation of voiding assays in mice: impact of genetic strains and sex. *Am. J. Physiol. Renal Physiol.* **308**, F1369-F1378. doi:10.1152/ajprenal.00072.2015
- Carpenter, D. O. and Bushkin-Bedient, S. (2013). Exposure to Chemicals and radiation during childhood and risk for cancer later in life. *J. Adolesc. Health* **52**(5, Supplement), S21-S29. doi:10.1016/j.jadohealth.2013.01.027
- Chen, Y. C., Guo, Y. L., Hsu, C. C. and Rogan, W. J. (1992). Cognitive development of Yu-Cheng ("oil disease") children prenatally exposed to heat-degraded PCBs. *JAMA* **268**, 3213-3218. doi:10.1001/jama.1992.03490220057028
- Chen, Y., Lun, A. T. L. and Smyth, G. K. (2014). Differential expression analysis of complex RNA-seq experiments using edgeR. In *Statistical Analysis of Next Generation Sequencing Data* (ed. S. Datta and D. Nettleton), pp. 51-74. Cham: Springer International Publishing (Frontiers in Probability and the Statistical Sciences).
- Chen, Y., Lun, A. T. L. and Smyth, G. K. (2016). From reads to genes to pathways: differential expression analysis of RNA-Seq experiments using Rsubread and the edgeR quasi-likelihood pipeline. *F1000Research* **5**, 1438. doi:10.12688/f1000research.8987.2
- Choi, J. B., Lee, J. G. and Kim, Y. S. (2010). Characteristics of autonomic nervous system activity in men with lower urinary tract symptoms (LUTS): analysis of heart rate variability in men with LUTS. *Urology* **75**, 138-142. doi:10.1016/j.urology.2009.08.018
- de Groat, W. C. (2013). Highlights in basic autonomic neuroscience: contribution of the urothelium to sensory mechanisms in the urinary bladder. *Auton. Neurosci.* **177**, 67-71. doi:10.1016/j.autneu.2013.03.010
- Devito, M. J., Birnbaum, L. S., Farland, W. H. and Gasiewicz, T. A. (1995). Comparisons of estimated human body burdens of dioxinlike chemicals and TCDD body burdens in experimentally exposed animals. *Environ. Health Perspect.* **103**, 820-831. doi:10.1289/ehp.95103820
- Durinck, S., Moreau, Y., Kasprzyk, A., Davis, S., De Moor, B., Brazma, A. and Huber, W. (2005). BioMart and Bioconductor: a powerful link between biological databases and microarray data analysis. *Bioinformatics* **21**, 3439-3440. doi:10.1093/bioinformatics/bti525
- Durinck, S., Spellman, P. T., Birney, E. and Huber, W. (2009). Mapping Identifiers for the Integration of Genomic Datasets with the R/Bioconductor package biomaRt. *Nat. Protoc.* **4**, 1184-1191. doi:10.1038/nprot.2009.97
- Edamitsu, T., Taguchi, K., Kobayashi, E. H., Okuyama, R. and Yamamoto, M. (2019). Aryl hydrocarbon receptor directly regulates artemin gene expression. *Mol. Cell. Biol.* **39**, e00190-19. doi:10.1128/MCB.00190-19
- Enomoto, H., Crawford, P. A., Gorodinsky, A., Heuckeroth, R. O., Johnson, E. M. and Milbrandt, J. (2001). RET signaling is essential for migration, axonal growth and axon guidance of developing sympathetic neurons. *Development* **128**, 3963-3974. doi:10.1242/dev.128.20.3963
- Gallili, T. (2015). dendextend: an R package for visualizing, adjusting and comparing trees of hierarchical clustering. *Bioinformatics* **31**, 3718-3720. doi:10.1093/bioinformatics/btv428
- Garcia, G. R., Shankar, P., Dunham, C. L., Garcia, A., La Du, J. K., Truong, L., Tilton, S. C. and Tanguay, R. L. (2018). Signaling events downstream of AHR activation that contribute to toxic responses: the functional role of an AHR-dependent long noncoding RNA (slincR) using the Zebrafish model. *Environ. Health Perspect.* **126**, 117002. doi:10.1289/EHP3281
- Gasiewicz, T. A., Geiger, L. E., Rucci, G. and Neal, R. A. (1983). Distribution, excretion, and metabolism of 2,3,7,8-tetrachlorodibenzo-p-dioxin in C57BL/6J, DBA/2J, and B6D2F1/J mice. *Drug Metab. Dispos.* **11**, 397-403.
- Gentleman, R. C., Carey, V. J., Bates, D. M., Bolstad, B., Dettling, M., Dudoit, S., Ellis, B., Gautier, L., Ge, Y., Gentry, J. et al. (2004). Bioconductor: open software development for computational biology and bioinformatics. *Genome Biol.* **5**, R80. doi:10.1186/gb-2004-5-10-r80
- Glebova, N. O. and Ginty, D. D. (2005). Growth and survival signals controlling sympathetic nervous system development. *Annu. Rev. Neurosci.* **28**, 191-222. doi:10.1146/annurev.neuro.28.061604.135659
- Grandjean, P. and Landrigan, P. (2006). Developmental neurotoxicity of industrial chemicals. *Lancet* **368**, 13. doi:10.1016/S0140-6736(06)96665-7
- Gu, Z., Eils, R. and Schlesner, M. (2016). Complex heatmaps reveal patterns and correlations in multidimensional genomic data. *Bioinformatics* **32**, 2847-2849. doi:10.1093/bioinformatics/btw313
- Guo, Y. L., Lin, C. J., Yao, W. J., Ryan, J. J. and Hsu, C. C. (1994). Musculoskeletal changes in children prenatally exposed to polychlorinated biphenyls and related compounds (Yu-Cheng children). *J. Toxicol. Environ. Health* **41**, 83-93. doi:10.1080/15287399409531828
- Gupta, A., Ketchum, N., Roehrborn, C. G., Schecter, A., Aragaki, C. C. and Michalek, J. E. (2006). Serum dioxin, testosterone, and subsequent risk of benign prostatic hyperplasia: a prospective cohort study of air force veterans. *Environ. Health Perspect.* **114**, 1649-1654. doi:10.1289/ehp.8957
- Heyne, G. W., Pliisch, E. H., Melberg, C. G., Sandgren, E. P., Peter, J. A. and Lipinski, R. J. (2015). A simple and reliable method for early pregnancy detection in inbred mice. *J. Am. Assoc. Lab. Anim. Sci.* **54**, 368-371.
- Hidaka, T., Ogawa, E., Kobayashi, E. H., Suzuki, T., Funayama, R., Nagashima, T., Fujimura, T., Aiba, S., Nakayama, K., Okuyama, R. et al. (2017). The aryl hydrocarbon receptor AhR links atopic dermatitis and air pollution via induction of the neurotrophic factor artemin. *Nat. Immunol.* **18**, 64-73. doi:10.1038/ni.3614
- Honma, Y., Araki, T., Gianino, S., Bruce, A., Heuckeroth, R. O., Johnson, E. M. and Milbrandt, J. (2002). Artemin is a vascular-derived neurotrophic factor for developing sympathetic neurons. *Neuron* **35**, 267-282. doi:10.1016/S0896-6273(02)00774-2
- Huber, W., Carey, V. J., Gentleman, R., Anders, S., Carlson, M., Carvalho, B. S., Bravo, H. C., Davis, S., Gatto, L., Girke, T. et al. (2015). Orchestrating high-throughput genomic analysis with Bioconductor. *Nat. Methods* **12**, 115-121. doi:10.1038/nmeth.3252
- Iida, M., Kim, E.-Y., Murakami, Y., Shima, Y. and Iwata, H. (2013). Toxic effects of 2,3,7,8-tetrachlorodibenzo-p-dioxin on the peripheral nervous system of developing red seabream (*Pagrus major*). *Aquatic Toxicol.* **128-129**, 193-202. doi:10.1016/j.aquatox.2012.12.009
- Jiang, H., Lei, R., Ding, S.-W. and Zhu, S. (2014). Skewer: a fast and accurate adapter trimmer for next-generation sequencing paired-end reads. *BMC Bioinformatics* **15**, 182. doi:10.1186/1471-2105-15-182
- Gogal, R. M. and Holladay, S. D. (2008). Perinatal TCDD exposure and the adult onset of autoimmune disease. *J. Immunotoxicol.* **5**, 413-418. doi:10.1080/10408360802483201
- Kapur, J., Sahoo, P. and Wong, A. (1985). A new method for gray-level picture thresholding using the entropy of the histogram. *Comp. Gr Image Process.* **29**, 273-285. doi:10.1016/0734-189X(85)90125-2
- Keil, K. P., Abler, L. L., Altmann, H. M., Wang, Z., Wang, P., Ricke, W. A., Bjorling, D. E. and Vezina, C. M. (2015). Impact of a folic acid-enriched diet on urinary tract function in mice treated with testosterone and estradiol. *Am. J. Physiol. Renal Physiol.* **308**, F1431-F1443. doi:10.1152/ajprenal.00674.2014
- Kim, D., Paggi, J. M., Park, C., Bennett, C. and Salzberg, S. L. (2019). Graph-based genome alignment and genotyping with HISAT2 and HISAT-genotype. *Nat. Biotechnol.* **37**, 907-915. doi:10.1038/s41587-019-0201-4
- Kim, D., Langmead, B. and Salzberg, S. L. (2015). HISAT: a fast spliced aligner with low memory requirements. *Nat. Methods* **12**, 357-360. doi:10.1038/nmeth.3317
- Langley-Evans, S. C. (2001). Fetal programming of cardiovascular function through exposure to maternal undernutrition. *Proc. Nutr. Soc.* **60**, 505-513. doi:10.1079/PNS2001111
- Langmead, B. and Salzberg, S. L. (2012). Fast gapped-read alignment with Bowtie 2. *Nat. Methods* **9**, 357-359. doi:10.1038/nmeth.1923
- Langmead, B., Trapnell, C., Pop, M. and Salzberg, S. L. (2009). Ultrafast and memory-efficient alignment of short DNA sequences to the human genome. *Genome Biol.* **10**, R25. doi:10.1186/gb-2009-10-3-r25
- Lau, W. A., Ventura, S. and Pennefather, J. N. (1998). Pharmacology of neurotransmission to the smooth muscle of the rat and the guinea-pig prostate glands. *J. Auton. Pharmacol.* **18**, 349-356. doi:10.1046/j.1365-2680.1998.1860349.x
- Lee, S. N., Chakrabarty, B., Wittmer, B., Papargiris, M., Ryan, A., Frydenberg, M., Lawrentschuk, N., Middendorff, R., Risbridger, G. P., Ellem, S. J. et al. (2017). Age Related Differences in Responsiveness to Sildenafil and Tamsulosin are due to Myogenic Smooth Muscle Tone in the Human Prostate. *Sci. Rep.* **7**, 10150. doi:10.1038/s41598-017-07861-x
- Lepor, H. (2005). Pathophysiology of lower urinary tract symptoms in the aging male population. *Rev. Urol.* **7**, S3-S11.
- Levi-Montalcini, R., Meyer, H. and Hamburger, V. (1954). In vitro experiments on the effects of mouse sarcomas 180 and 37 on the spinal and sympathetic ganglia of the chick embryo. *Cancer Res.* **14**, 49-57.
- Levin, E. D., Schantz, S. L. and Bowman, R. E. (1988). Delayed spatial alternation deficits resulting from perinatal PCB exposure in monkeys. *Arch. Toxicol.* **62**, 267-273. doi:10.1007/BF00332486
- Li, H., Handsaker, B., Wysoker, A., Fennell, T., Ruan, J., Homer, N., Marth, G., Abecasis, G. and Durbin, R. (2009). The sequence alignment/map format and SAMtools. *Bioinformatics* **25**, 2078-2079. doi:10.1093/bioinformatics/btp352
- Lin, T.-M., Rasmussen, N. T., Moore, R. W., Albrecht, R. M. and Peterson, R. E. (2003). Region-specific inhibition of prostatic epithelial bud formation in the urogenital sinus of C57BL/6 mice exposed in utero to 2,3,7,8-Tetrachlorodibenzo-p-dioxin. *Toxicol. Sci.* **76**, 171-181. doi:10.1093/toxsci/kgf218
- Lin, T.-M., Rasmussen, N. T., Moore, R. W., Albrecht, R. M. and Peterson, R. E. (2004). 2,3,7,8-tetrachlorodibenzo-p-dioxin inhibits prostatic epithelial bud formation by acting directly on the urogenital sinus. *J. Urol.* **172**, 365-368. doi:10.1097/01.ju.0000124989.02257.38

- Livak, K. J. and Schmittgen, T. D.** (2001). Analysis of relative gene expression data using real-time quantitative PCR and the 2(-Delta Delta C(T)) method. *Methods* **25**, 402-408. doi:10.1006/meth.2001.1262
- Love, M. I., Anders, S., Kim, V. and Huber, W.** (2015). RNA-Seq workflow: gene-level exploratory analysis and differential expression. *F1000Research* **4**, 1070. doi:10.12688/f1000research.7035.1
- Lucier, G. W.** (1991). Humans are a sensitive species to some of the biochemical effects of structural analogs of dioxin. *Environ. Toxicol. Chem.* **10**, 727-735. doi:10.1002/etc.5620100604
- Lun, A. T. L., Chen, Y. and Smyth, G. K.** (2016). It's DE-licious: a recipe for differential expression analyses of RNA-seq experiments using quasi-likelihood methods in edgeR. *Method. Mol. Biol.* **1418**, 391-416. doi:10.1007/978-1-4939-3578-9\_19
- Maden, C. H., Gomes, J., Schwarz, Q., Davidson, K., Tinker, A. and Ruhrberg, C.** (2012). NRP1 and NRP2 cooperate to regulate gangliogenesis, axon guidance and target innervation in the sympathetic nervous system. *Dev. Biol.* **369**, 277-285. doi:10.1016/j.ydbio.2012.06.026
- Magnon, C., Hall, S. J., Lin, J., Xue, X., Gerber, L., Freedland, S. J. and Frenette, P. S.** (2013). Autonomic nerve development contributes to prostate cancer progression. *Science* **341**, 1236361. doi:10.1126/science.1236361
- Mccarthy, D. J. and Smyth, G. K.** (2009). Testing significance relative to a fold-change threshold is a TREAT. *Bioinformatics* **25**, 765-771. doi:10.1093/bioinformatics/btp053
- Mccarthy, D. J., Chen, Y. and Smyth, G. K.** (2012). Differential expression analysis of multifactor RNA-Seq experiments with respect to biological variation. *Nucleic Acids Res.* **40**, 4288-4297. doi:10.1093/nar/gks042
- Moore, R. W., Rudy, T. A., Lin, T. M., Ko, K. and Peterson, R. E.** (2001). Abnormalities of sexual development in male rats with in utero and lactational exposure to the antiandrogenic plasticizer Di(2-ethylhexyl) phthalate. *Environ. Health Perspect.* **109**, 229-237. doi:10.1289/ehp.01109229
- Moore, R. W., Fritz, W. A., Schneider, A. J., Lin, T.-M., Branam, A. M., Safe, S. and Peterson, R. E.** (2016). 2,3,7,8-Tetrachlorodibenzo-p-dioxin has both pro-carcinogenic and anti-carcinogenic effects on neuroendocrine prostate carcinoma formation in TRAMP Mice. *Toxicol. Appl. Pharmacol.* **305**, 242-249. doi:10.1016/j.taap.2016.04.018
- Nangle, M. R. and Keast, J. R.** (2011). Semaphorin 3A inhibits growth of adult sympathetic and parasympathetic neurones via distinct cyclic nucleotide signalling pathways. *Br. J. Pharmacol.* **162**, 1083-1095. doi:10.1111/j.1476-5381.2010.01108.x
- Okey, A. B., Riddick, D. S. and Harper, P. A.** (1994). The Ah receptor: mediator of the toxicity of 2,3,7,8-tetrachlorodibenzo-p-dioxin (TCDD) and related compounds. *Toxicol. Lett.* **70**, 1-22. doi:10.1016/0378-4274(94)90139-2
- Oppenheim, R. W.** (1991). Cell death during development of the nervous system. *Ann. Rev. Neurosci.* **14**, 453-501. doi:10.1146/annurev.ne.14.030191.002321
- Organtini, K. L., Hubbard, T. D., Perdew, G. H. and Dorman, F. L.** (2017). Assessment of Ah receptor transcriptional activity mediated by halogenated dibenzo-p-dioxins and dibenzofurans (PXDD/Fs) in human and mouse cell systems. *J. Environ. Sci. Health A Toxic Hazard. Subst. Environ. Eng.* **52**, 1295-1302. doi:10.1080/10934529.2017.1362290
- Pham, N. T., Nishijo, M., Pham, T. T., Tran, N. N., Le, V. Q., Tran, H. A., Phan, H. A. V., Nishino, Y. and Nishijo, H.** (2019). Perinatal dioxin exposure and neurodevelopment of 2-year-old Vietnamese children in the most contaminated area from Agent Orange in Vietnam. *Sci. Total Environ.* **678**, 217-226. doi:10.1016/j.scitotenv.2019.04.425
- Potischman, N. and Troisi, R.** (1999). In-utero and early life exposures in relation to risk of breast cancer. *Cancer Causes Control* **10**, 561-573. doi:10.1023/A:1008955110868
- Powell, J. B. and Ghotbaddini, M.** (2014). Cancer-promoting and inhibiting effects of dietary compounds: role of the Aryl hydrocarbon Receptor (AHR). *Biochem. Pharmacol.* **3**, 131. doi:10.4172/2167-0501.1000131
- Richeri, A., Vierci, G., Martínez, G. F., Latorre, M. P., Chalar, C. and Brauer, M. M.** (2020). Neuropeilin-1 receptor in the rapid and selective estrogen-induced neurovascular remodeling of rat uterus. *Cell Tissue Res.* **381**, 299-308. doi:10.1007/s00441-020-03196-8
- Ricke, W. A., Lee, C. W., Clapper, T. R., Schneider, A. J., Moore, R. W., Keil, K. P., Abler, L. L., Wynder, J. L., López Alvarado, A., Beaubrun, I. et al.** (2016). In utero and lactational TCDD exposure increases susceptibility to lower urinary tract dysfunction in adulthood. *Toxicol. Sci.* **150**, 429-440. doi:10.1093/toxsci/kfw009
- Ritter, K. E., Wang, Z., Vezina, C. M., Bjorling, D. E. and Southard-Smith, E. M.** (2017). Serotonin receptor 5-HT3A Affects development of bladder innervation and urinary bladder function. *Front. Neurosci.* **11**, 690. doi:10.3389/fnins.2017.00690
- Robinson, M. D. and Oshlack, A.** (2010). A scaling normalization method for differential expression analysis of RNA-seq data. *Genome Biol.* **11**, R25. doi:10.1186/gb-2010-11-3-r25
- Robinson, M. D. and Smyth, G. K.** (2007). Moderated statistical tests for assessing differences in tag abundance. *Bioinformatics* **23**, 2881-2887. doi:10.1093/bioinformatics/btm453
- Robinson, M. D., Mccarthy, D. J. and Smyth, G. K.** (2010). edgeR: a Bioconductor package for differential expression analysis of digital gene expression data. *Bioinformatics* **26**, 139-140. doi:10.1093/bioinformatics/btp616
- Rogan, W. J., Gladen, B., Hung, K., Koong, S., Shih, L., Taylor, J., Wu, Y., Yang, D., Ragan, N. and Hsu, C.** (1988). Congenital poisoning by polychlorinated biphenyls and their contaminants in Taiwan. *Science* **241**, 334-336. doi:10.1126/science.3133768
- Ruetten, H., Wegner, K. A., Zhang, H. L., Wang, P., Sandhu, J., Sandhu, S., Mueller, B., Wang, Z., Macoska, J., Peterson, R. E. et al.** (2019). Impact of sex, androgens, and prostate size on C57BL/6J mouse urinary physiology: functional assessment. *Am. J. Physiol. Renal Physiol.* **317**, F996-F1009. doi:10.1152/ajprenal.00270.2019
- Saito, M., Mitsui, T. and Mizuno, T.** (2000). Genistein represses the induction of prostatic buds by testosterone. *J. Soc. Biol.* **194**, 95-97. doi:10.1051/jbio/2000194020095
- Simmons, R. A., Templeton, L. J. and Gertz, S. J.** (2001). Intrauterine growth retardation leads to the development of type 2 diabetes in the rat. *Diabetes* **50**, 2279-2286. doi:10.2337/diabetes.50.10.2279
- Sunahara, G. I., Nelson, K. G., Wong, T. K. and Lucier, G. W.** (1987). Decreased human birth weights after in utero exposure to PCBs and PCDFs are associated with decreased placental EGF-stimulated receptor autophosphorylation capacity. *Mol. Pharmacol.* **32**, 572-578.
- Tengowski, M. W., Bjorling, D. E., Albrecht, R. M. and Saban, R.** (1997). Use of gold-labeled ovalbumin to correlate antigen deposition and localization with tissue response. *J. Pharmacol. Toxicol. Methods* **37**, 15-21. doi:10.1016/S1056-8719(96)00143-8
- Timms, B. G., Howdeshell, K. L., Barton, L., Bradley, S., Richter, C. A. and Vom Saal, F. S.** (2005). Estrogenic chemicals in plastic and oral contraceptives disrupt development of the fetal mouse prostate and urethra. *Proc. Natl. Acad. Sci. USA* **102**, 7014-7019. doi:10.1073/pnas.0502544102
- Turco, A. E., Cadena, M. T., Zhang, H. L., Sandhu, J. K., Oakes, S. R., Chathurvedula, T., Peterson, R. E., Keast, J. R. and Vezina, C. M.** (2019). A temporal and spatial map of axons in developing mouse prostate. *Histochem. Cell Biol.* **152**, 35-45. doi:10.1007/s00418-019-01784-6
- Turco, A. E., Thomas, S., Crawford, L. K., Tang, W., Peterson, R. E., Li, L., Ricke, W. A. and Vezina, C. M.** (2020). In utero and lactational 2,3,7,8-tetrachlorodibenzo-p-dioxin (TCDD) exposure exacerbates urinary dysfunction in hormone-treated C57BL/6J mice through a non-malignant mechanism involving proteomic changes in the prostate that differ from those elicited by testosterone and estradiol. *Am. J. Clin. Exp. Urol.* **8**, 59-72. https://www.ncbi.nlm.nih.gov/pmc/articles/PMC7076297/
- Vezina, C. M., Allgeier, S. H., Moore, R. W., Lin, T.-M., Bemis, J. C., Hardin, H. A., Gasiewicz, T. A. and Peterson, R. E.** (2008a). Dioxin causes ventral prostate agenesis by disrupting dorsoventral patterning in developing mouse prostate. *Toxicol. Sci.* **106**, 488-496. doi:10.1093/toxsci/kfn183
- Vezina, C. M., Allgeier, S. H., Fritz, W. A., Moore, R. W., Strerath, M., Bushman, W. and Peterson, R. E.** (2008b). Retinoic acid induces prostatic bud formation. *Dev. Dyn.* **237**, 1321-1333. doi:10.1002/dvdy.21526
- Vorderstrasse, B. A., Fenton, S. E., Bohn, A. A., Cundiff, J. A. and Lawrence, B. P.** (2004). A novel effect of dioxin: exposure during pregnancy severely impairs mammary gland differentiation. *Toxicol. Sci.* **78**, 248-257. doi:10.1093/toxsci/kfh062
- Wang, R. Y., Jain, R. B., Wolkin, A. F., Rubin, C. H. and Needham, L. L.** (2009). Serum concentrations of selected persistent organic pollutants in a sample of pregnant females and changes in their concentrations during gestation. *Environ. Health Perspect.* **117**, 1244-1249. doi:10.1289/ehp.0800105
- White, C. W., Short, J. L., Haynes, J. M., Evans, R. J. and Ventura, S.** (2010). The residual nonadrenergic contractile response to nerve stimulation of the mouse prostate is mediated by acetylcholine but not ATP in a comparison with the mouse vas deferens. *J. Pharmacol. Exp. Ther.* **335**, 489-496. doi:10.1124/jpet.110.172130
- Wickham, H.** (2009). *ggplot2: Elegant Graphics for Data Analysis*. New York: Springer-Verlag.
- Woodruff, T. J., Zota, A. R. and Schwartz, J. M.** (2011). Environmental chemicals in pregnant women in the United States: NHANES 2003-2004. *Environ. Health Perspect.* **119**, 878-885. doi:10.1289/ehp.1002727
- Ye, M., Warner, M., Mocarrelli, P., Brambilla, P. and Eskenazi, B.** (2018). Prenatal exposure to TCDD and atopic conditions in the Seveso second generation: a prospective cohort study. *Environ. Health* **17**, 22. doi:10.1186/s12940-018-0365-2
- Zhang, H., Wang, L., Shen, S., Wang, C., Xiang, Z., Han, X. and Li, D.** (2017). Toxic effects of microcystin-LR on the development of prostate in mice. *Toxicology* **380**, 50-61. doi:10.1016/j.tox.2017.02.004
